# Supplementary material
Source: publisher figshare collection journal article supplement (https://geolsoc.figshare.com/ndownloader/files/25853229)
Supplement: Supplementary file 1 [file 25853229]

## Sheet: table 1
	Table S3
	Location	Site №	sample	d13C (V-PDB)	d18O (V-PDB)	d18O (V-SMOW)	Microfacies	Age (kyr ago)
	Kurkur Oasis	1	1	-3.15976	-10.5047	20.0806	FA1, FA5
			2	-2.92653	-10.2927	20.2991	FA5
			3	-2.09919	-9.15437	21.4727	FA5
			4	-1.60221	-9.74291	20.8659	FA5
			5	-2.26751	-9.96287	20.6392	FA4
	Kurkur Oasis	2	1	-1.29832	-8.89181	21.7433	FA3
			2	-1.77249	-10.0391	20.5606	FA1	139 ± 11
			3	-1.13067	-9.32412	21.2977	FA1
			4	-1.73855	-9.84422	20.7615	FA3
			5	-1.58866	-10.073	20.5256	FA3
			6	-1.89665	-9.85944	20.7458	FA3
	Kurkur Oasis	3	1	-2.04424	-9.70626	20.9037	FA4, FA5
			2	-2.97417	-11.2563	19.3057	FA5
			3	-2.16937	-10.6561	19.9245	FA3
			4	-2.00879	-9.09723	21.5316	FA5
	Kurkur Oasis	4	1	-1.77482	-9.6409	20.9711	FA4, FA3
			2	-2.62058	-10.154	20.4421	FA3
			3	-3.12513	-11.4366	19.1198	FA2
	Kurkur Oasis	5	1	-1.61676	-9.88206	20.7225	FA4, FA3
			2	-3.13733	-12.4887	18.0353	FA2	251.1 ± 4.7
			3	-2.89533	-11.8061	18.7389	FA2
	Kurkur Oasis	6	1	-1.44825	-10.6804	19.8995	FA4
			2	-2.22344	-12.6903	17.8275	FA2
			3	-2.56688	-13.2636	17.2365	FA2	326 ± 14
			4	-1.81494	-11.8701	18.673	FA2
	Kurkur Oasis	7	1	-2.68657	-11.0069	19.5628	FA3	283 ± 17
			2	-2.41444	-10.3001	20.2915	FA3
	Dineigil Oasis	1	1	-6.10658	-10.7188	19.8599	FA4
			2	-6.02331	-10.2314	20.3623	FA4, FA3
			3	-6.14174	-10.1904	20.4047	FA4
			4	-5.26762	-10.0526	20.5467	FA4	11.7 ± 1.2
	Gebel El-Digm	1	1	-2.46127	-9.56491	21.0494	FA3
			2	-2.34069	-8.71798	21.9225	FA3
			3	-1.97524	-8.90271	21.7321	FA3
			4./1.	-2.32787	-9.1432	21.4842	FA3
			4./2.	-1.94567	-9.40237	21.217	FA3
			5	-2.31185	-8.72226	21.9181	FA3
			6./1.	-2.06216	-11.3445	19.2148	FA3, FA6	258 ± 20
			6./2.	-2.11673	-10.1634	20.4325	FA3, FA6
			7./1.	-3.02149	-10.1504	20.4458	FA3, FA6
			7./2.	-2.92566	-10.0391	20.5606	FA3, FA6
	Gebel El-Digm	2	1	-3.77444	-10.2357	20.358	FA3
			2	-3.89261	-11.3242	19.2358	FA3, FA4
			3	-3.67921	-11.2957	19.2651	FA3
			4	-4.31359	-12.06	18.4772	FA3
	Gebel El-Digm	3	1	-3.44538	-10.2832	20.309	FA1
			2	-4.18201	-10.5335	20.0509	FA3	368 ± 14
			3	-4.0339	-10.8257	19.7497	FA3, FA4
			4	-5.12672	-11.2274	19.3355	FA1
			5	-3.37078	-10.963	19.6081	FA4
	Dungul Oasis	1	1	-2.96241	-9.71995	20.8896	FA3	43.52 ± 0.23
			2	-3.39451	-11.3037	19.2569	FA4
			3	-4.27574	-10.4989	20.0865	FA3
			4	-2.71507	-11.0998	19.4671	FA3
			5	-2.49644	-10.6431	19.9379	FA3
			6	-3.05141	-11.0819	19.4855	FA4
			7	-3.68496	-11.4236	19.1333	FA3
	Dungul Oasis	2	1	-3.25011	-11.2281	19.3348	FA4
			2	-2.3678	-9.96297	20.6391	FA4
			3	-2.37051	-9.99469	20.6064	FA3
			4./1.	-2.57201	-10.2151	20.3791	FA3
			4./2.	-3.17354	-11.1397	19.426	FA3
			5./1.	-3.9133	-11.9853	18.5542	FA4
			5./2.	-3.0439	-10.7176	19.8611	FA4
			6	-2.87343	-10.4734	20.1128	FA1
	Dungul Oasis	3	1	-2.88844	-10.648	19.9328	FA1
			2	-5.12375	-8.49457	22.1529	FA1
			3	-2.42046	-9.49715	21.1193	FA4
	Dungul Oasis	4	1	-2.73138	-10.5038	20.0815	FA3
			2	-5.12395	-9.8668	20.7382	FA1
	Dungul Oasis	5	1	-1.25074	-9.43073	21.1878	FA1, FA4
			2	-1.62141	-9.61834	20.9944	FA1
			3	-1.20105	-9.79	20.8174	FA3, FA5
			4	-1.56701	-8.68933	21.9521	FA3
			5	-1.50981	-9.37274	21.2475	FA4	184.4 ± 5.4
			6	-1.2853	-9.0497	21.5806	FA3
	Gebel Kalabsha	1	calcite	-5.30331	-12.336	18.1927	country rock
			rock	-5.23876	-11.8617	18.6816	rock
			2/1.	-6.30134	-11.6599	18.8896	Cement
			2/2.	-7.02083	-11.2882	19.2729	Cement
			2/3.	-6.77753	-11.3826	19.1756	Cement
			2/4.	-9.02089	-11.7774	18.7685	Cement
